# Supplementary figures and images for: MEOX2 Regulates the Growth and Survival of Glioblastoma Stem Cells by Modulating Genes of the Glycolytic Pathway and Response to Hypoxia
Source: MDPI journal article supplement (doi:10.3390/cancers14092304), 2022-05-06

Figure 1(c)

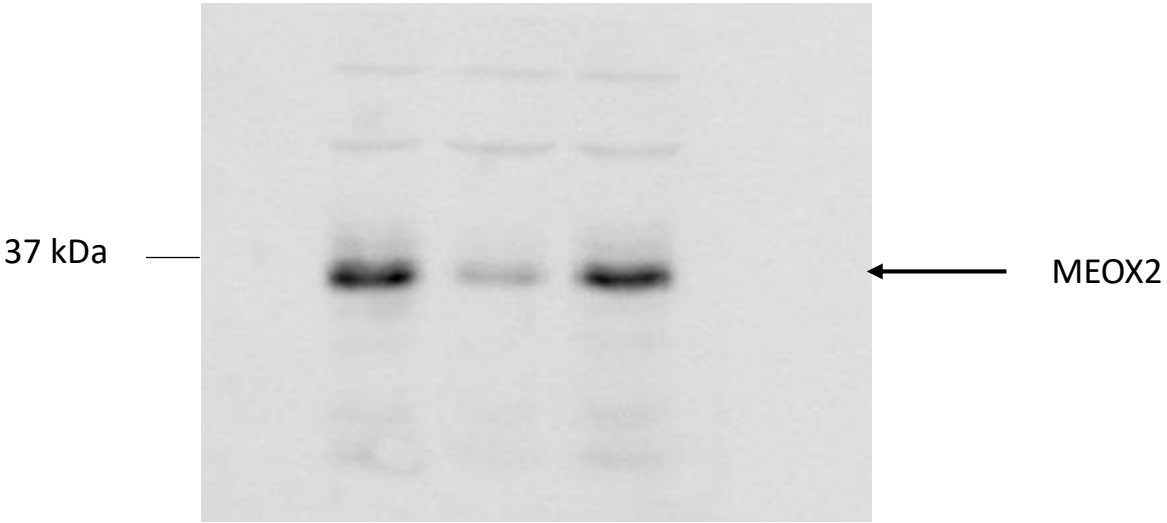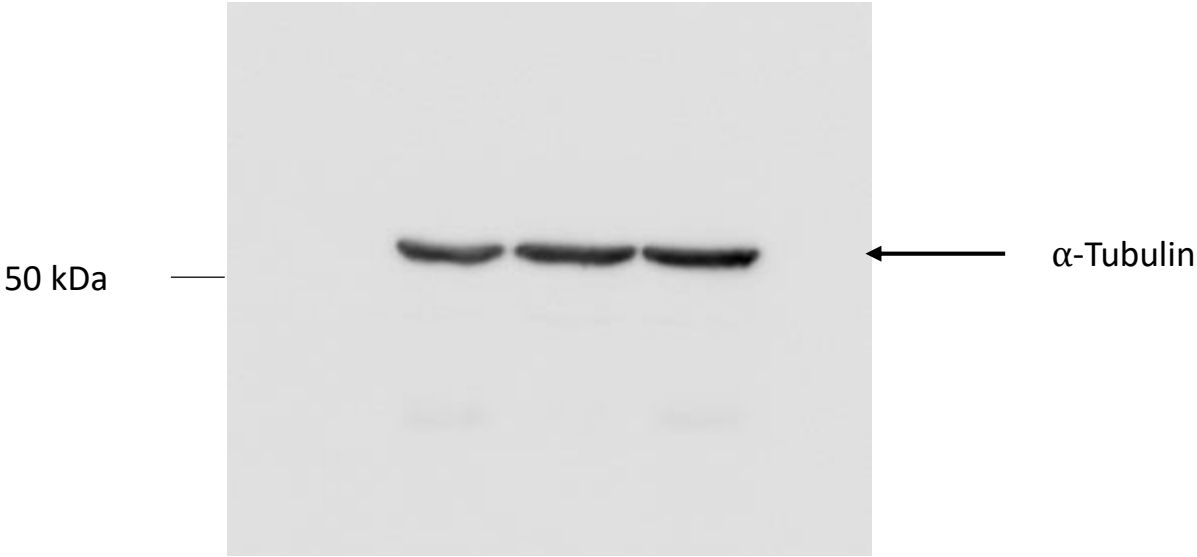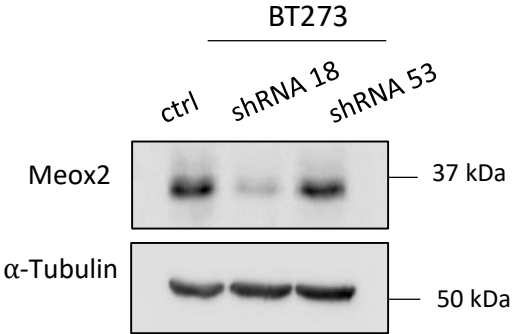

Figure 1(d)

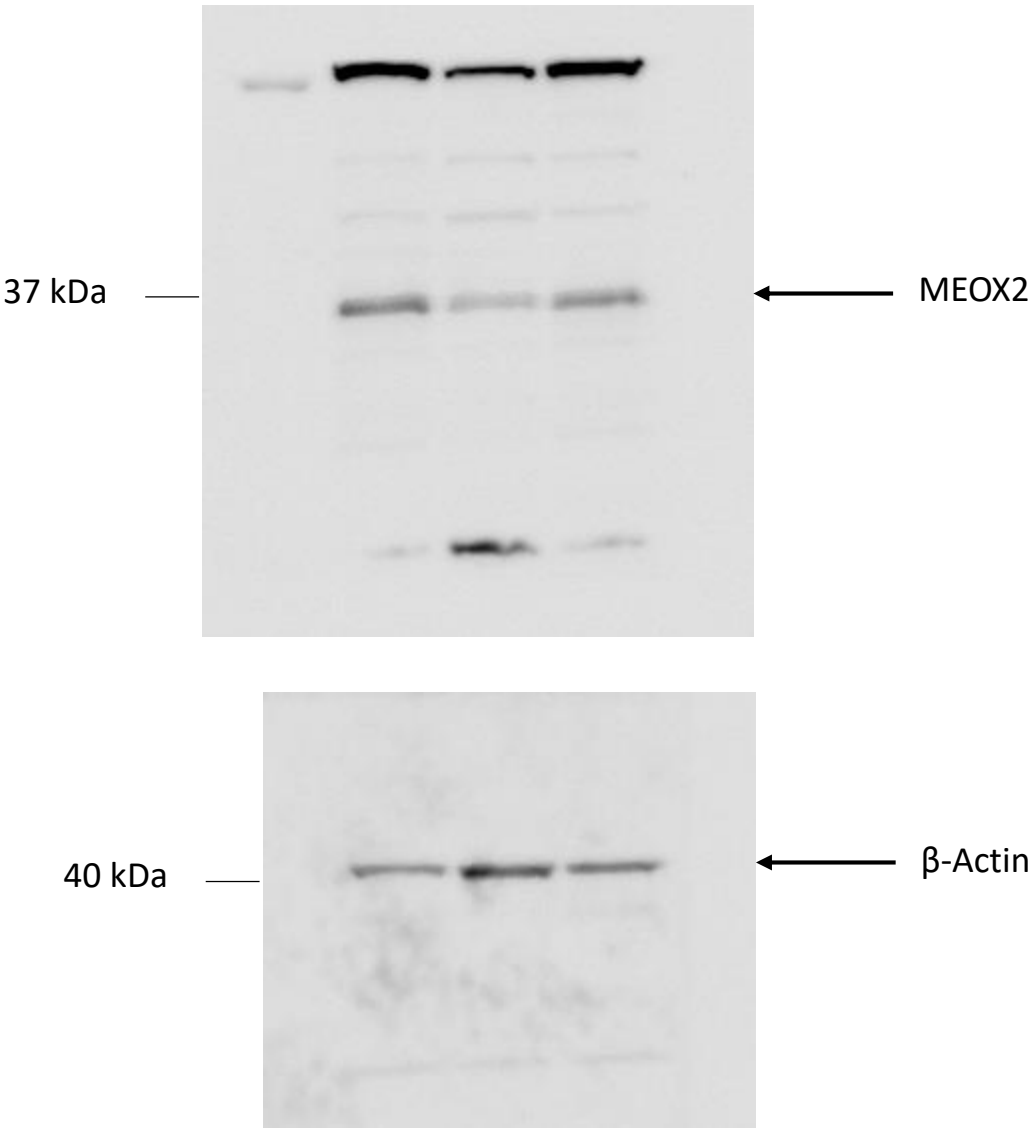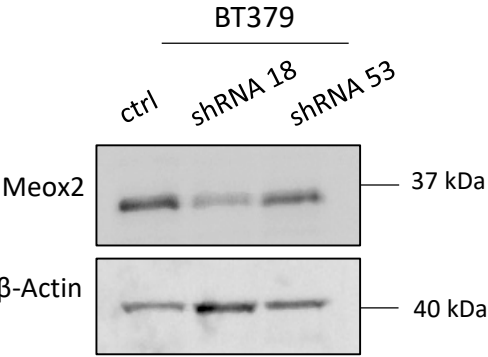

Figure 2(c)

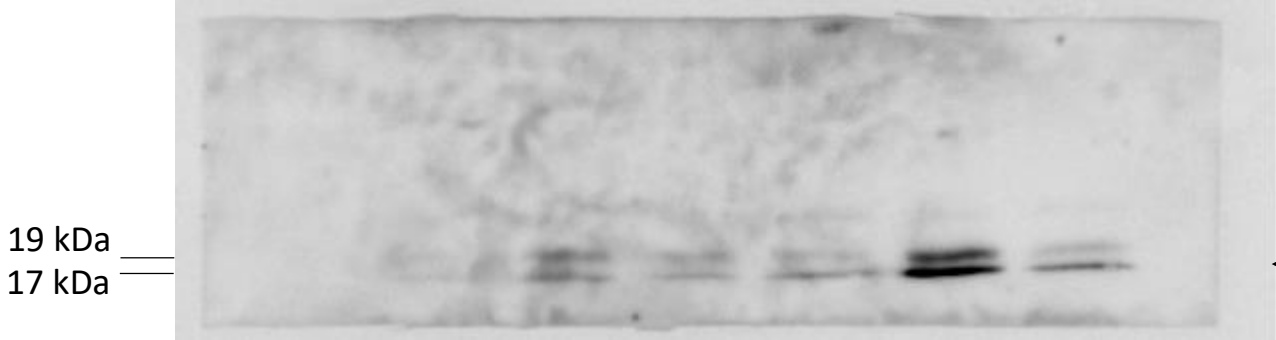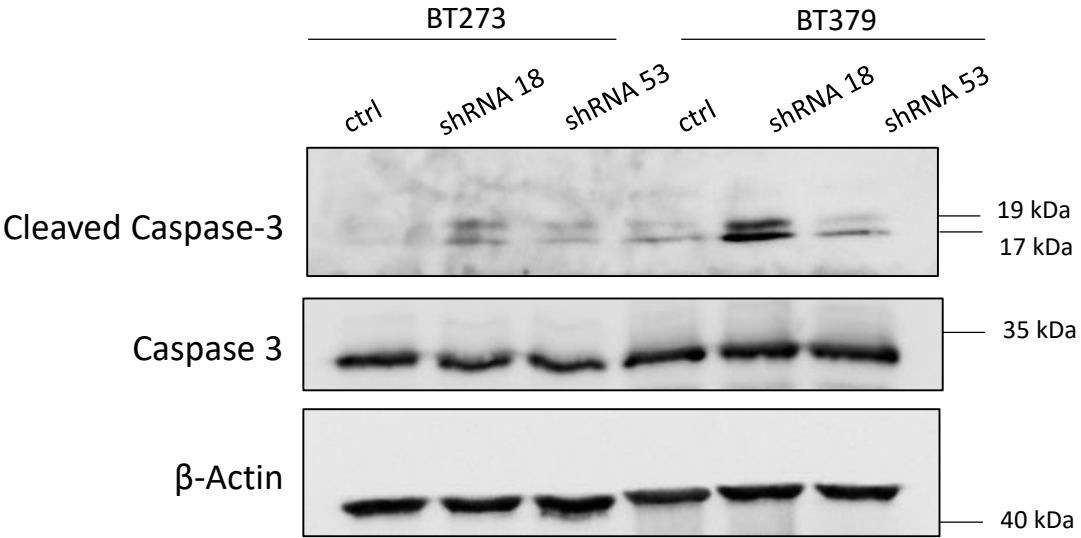

Cleaved Caspase-3

$\beta$ -Actin

Caspase 3

Figure S3

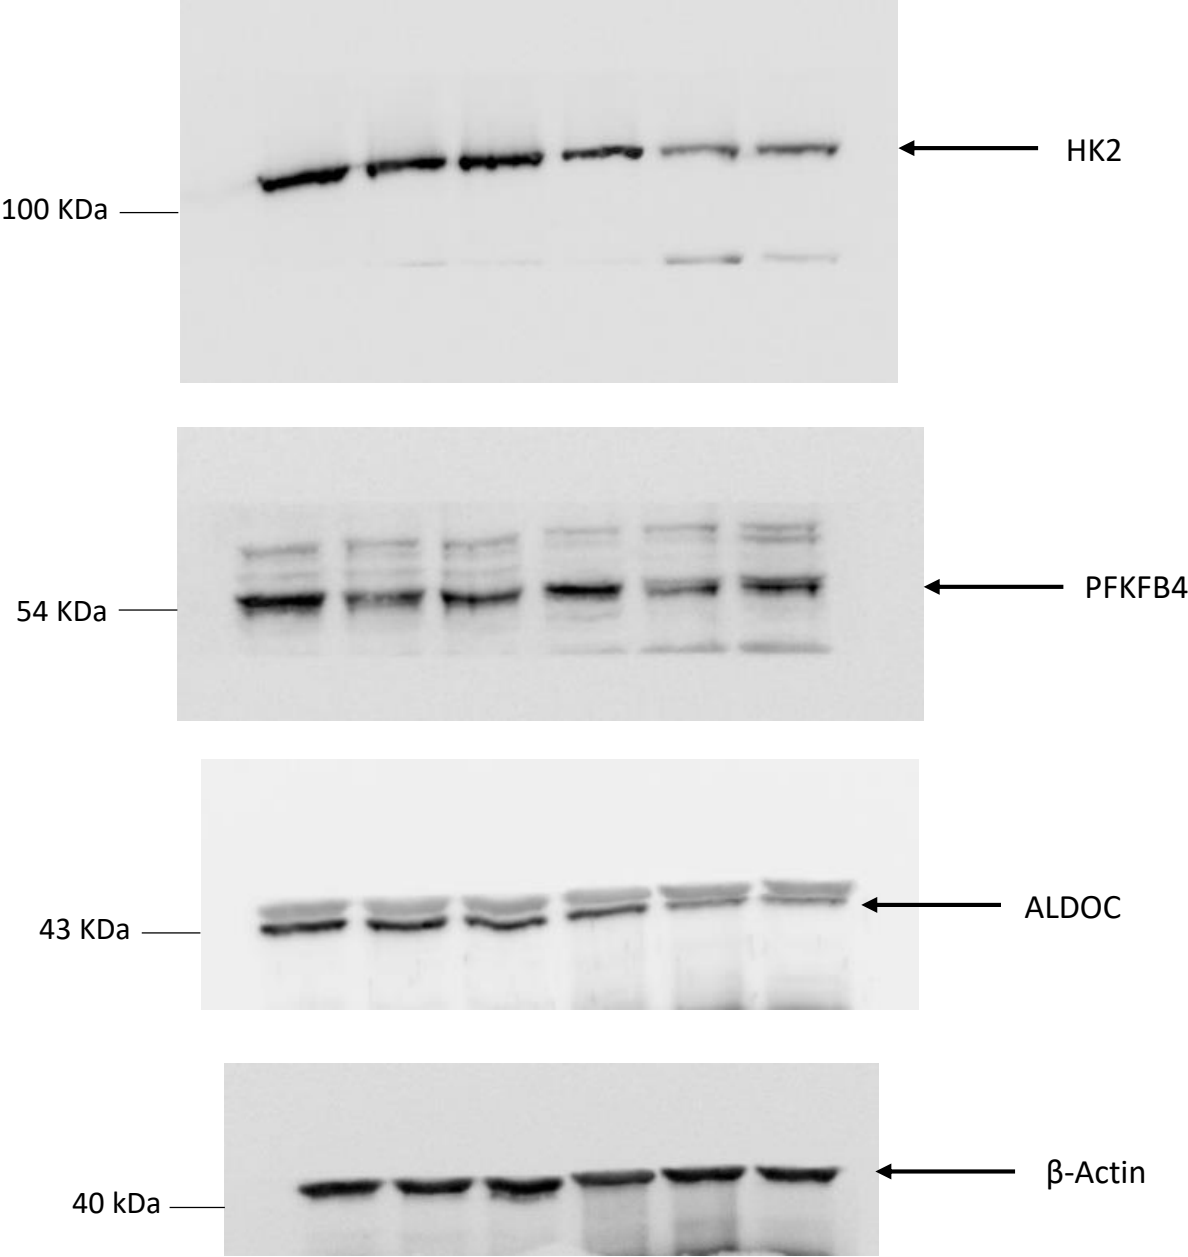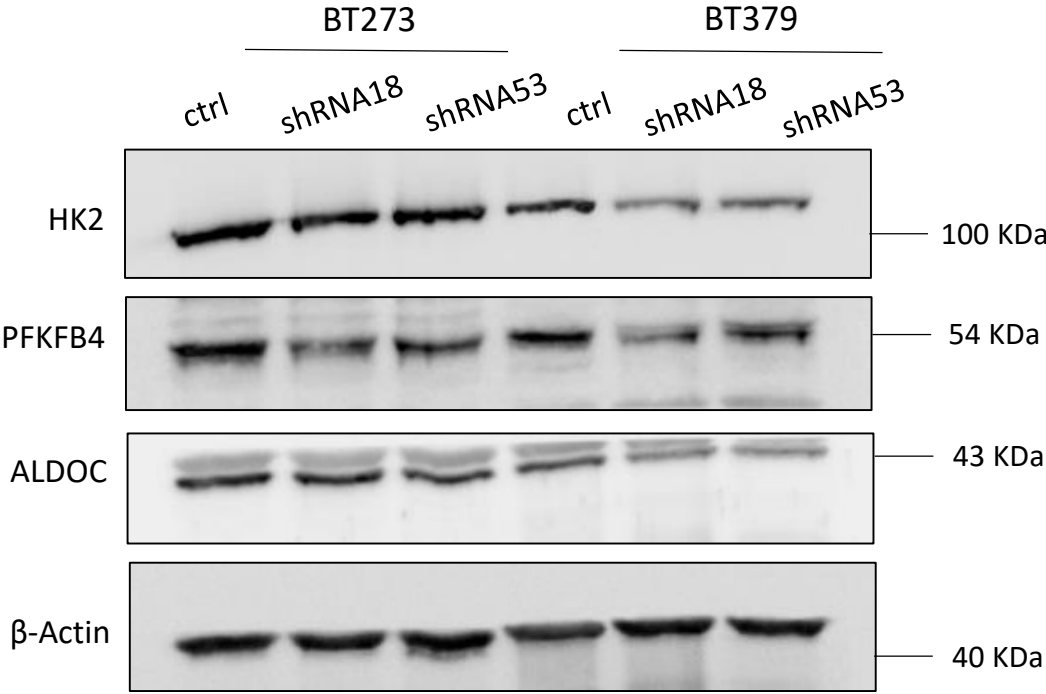

Supplement: s1 [file s1]
